# Supplementary material for: The Impact of Learning Spaces in Undergraduate Dental Education: A Scoping Review
Source: Research Square preprint supplement (doi:10.21203/rs.3.rs-7723267/v1), 2025-11-03
Supplement: Supplementary file 1 [file 5d22465d6119fa67e2f8e4a7.docx]

Example of search terms and process deployed in the Embase database during development of the comprehensive search strategy for this scoping review.

| **Search** | **Query** | **Records retrieved** |
| --- | --- | --- |
| #1 | 'dental student'/exp OR 'dental hygiene student'/exp OR 'dental therapist'/exp OR 'dental assistant'/exp | 21,611 |
| #2 | student*:ti OR undergraduate*:ti OR learner*:ti OR trainee*:ti | 173,723 |
| #3 | student*:ab OR undergraduate*:ab OR learner*:ab OR trainee*:ab | 483,781 |
| #4 | #2 OR #3 | 529,396 |
| #5 | #1 AND #4 | 8,025 |
| #6 | 'clinical competence'/exp OR 'outcome of education'/exp OR 'qualitative research'/de | 171,422 |
| #7 | ((survey*:ti OR questionnaire*:ti OR instrument*:ti OR interview*:ti OR 'focus group*':ti OR feedback or:ti) AND quantitative:ti OR qualitative:ti OR assess*:ti OR evaluat*:ti OR measure*:ti OR 'dental clinical learning environment instrument':ti OR 'health education learning environment survey':ti OR 'learning space rating system':ti OR impact*:ti OR effect*:ti OR experience*:ti OR attitude* or:ti) AND perception*:ti OR opinion*:ti OR confidence:ti OR knowledge:ti OR skill*:ti OR abilit*:ti OR attribute*:ti OR performance:ti OR competenc*:ti OR behavio*:ti OR 'learning outcome*':ti | 940,169 |
| #8 | ((survey*:ab OR questionnaire*:ab OR instrument*:ab OR interview*:ab OR 'focus group*':ab OR feedback or:ab) AND quantitative:ab OR qualitative:ab OR assess*:ab OR evaluat*:ab OR measure*:ab OR 'dental clinical learning environment instrument':ab OR 'health education learning environment survey':ab OR 'learning space rating system':ab OR impact*:ab OR effect*:ab OR experience*:ab OR attitude* or:ab) AND perception*:ab OR opinion*:ab OR confidence:ab OR knowledge:ab OR skill*:ab OR abilit*:ab OR attribute*:ab OR performance:ab OR competenc*:ab OR behavio*:ab OR 'learning outcome*':ab | 6,143,455 |
| #9 | #7 OR #8 | 6,416,358 |
| #10 | #6 OR #9 | 6,495,818 |
| #11 | 'learning environment'/exp AND ('dental clinic'/exp OR 'dental education'/exp) | 23 |
| #12 | 'learning space*':ti OR 'teaching space*':ti OR 'education* space*':ti OR 'learning environment*':ti OR 'teaching environment*':ti OR 'education* environment*':ti | 2,057 |
| #13 | 'learning space*':ab OR 'teaching space*':ab OR 'education* space*':ab OR 'learning environment*':ab OR 'teaching environment*':ab OR 'education* environment*':ab | 10,214 |
| #14 | #12 OR #13 | 13,322 |
| #15 | #11 OR #14 | 13,325 |
| #16 | #5 AND #10 AND #15 | 178 |
| No date or language limits applied. | |  |
